# Supplementary material
Source: PubMed Central journal article supplement (PMC7054717)
Supplement: mmc1.pdf [file mmc1.pdf]

YMTHE, Volume 28

## **Supplemental Information**

### **The Effect of CpG Sequences on Capsid-Specific CD8<sup>+</sup> T Cell Responses to AAV Vector Gene Transfer**

**ZhiQuan Xiang, Raj K. Kurupati, Yan Li, Klaudia Kuranda, Xiangyang Zhou, Federico Mingozzi, Katherine A. High, and Hildegund C.J. Ertl**

### AAV8<sub>SIINFEKL</sub>-EF1-LacZ

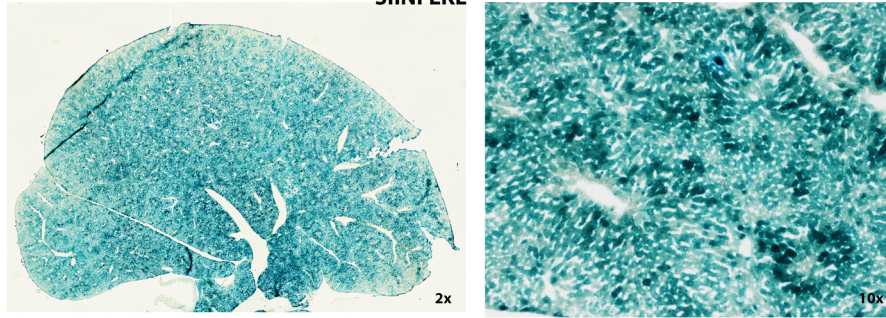

### AAV8<sub>SIINFEKL</sub>-CB-LacZ

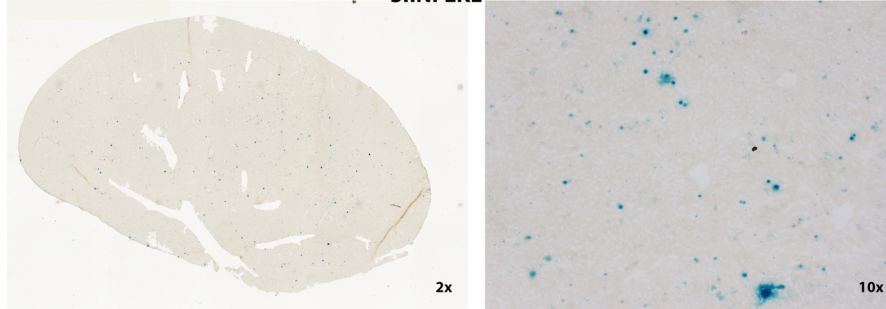

**Figure S1. Transgene product expression in mouse livers.** Male C57Bl/6 mice were injected i.v. with  $1 \times 10^{11}$  vg of AAV8<sub>SIINFEKL</sub>-EF1LacZ or AAV8<sub>SIINFEKL</sub>-CBLacZ vector. Mice were euthanized 14 days later, and liver sections were prepared and stained for  $\beta$ -Gal expression. The upper panels show the stained liver of a mouse injected with AAV8<sub>SIINFEKL</sub>-EF1LacZ at magnifications of 2x (left) and 10X (right). The lower panels show the liver sections from a mouse injected with the AAV8<sub>SIINFEKL</sub>-CB-LacZ vector at the same magnifications.

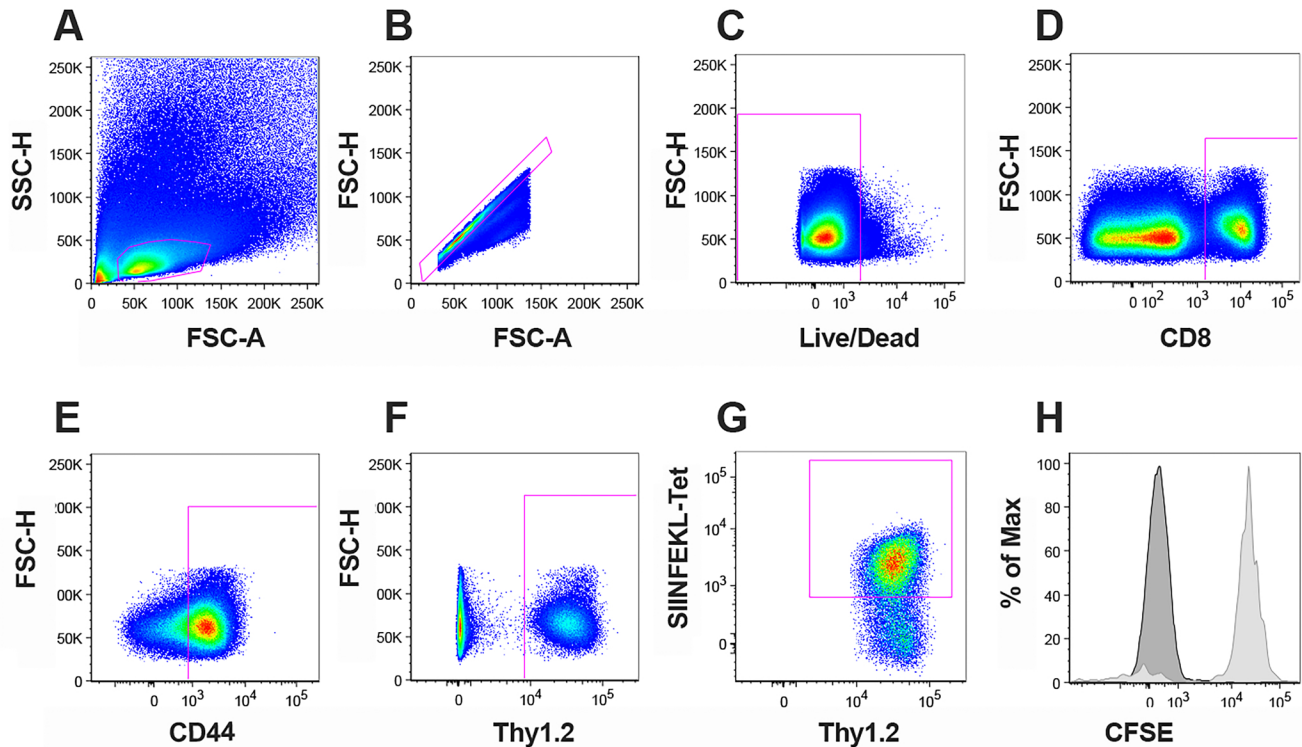

**Figure S2. Gating Strategy.** The blots show a liver sample from a mouse transferred with splenocytes from congenic AdC7-NP-Ova-GFP-immune donors. (A) Cells were gated onto lymphoid cells. (B) Cells were gated onto single cells using forward scatter height (FSC-H) over forward scatter area (FSC-A). (C) Single cells were gated onto live cells using a dead cell stain over FSC-H. (D) Cells were gated onto cells expressing CD8 (E) which were then gated onto CD44<sup>+</sup> cells and (F) then Thy1.2<sup>+</sup> cells. All three gates were set against FSC-H (G). Thy1.2<sup>+</sup> cells were blotted against the SIINFEKL tetramer. (H) Live SIINFEKL tetramer<sup>+</sup>Thy1.2<sup>+</sup>CD44<sup>+</sup>CD8<sup>+</sup> lymphoid cells were then blotted against events (% of Max) over CFSE to determine cell proliferation identified by CFSE loss.
